# Supplementary material
Source: PubMed Central journal article supplement (PMC8785250)
Supplement: NIHMS1768772-supplement-Supplemental_Digital_Content.pdf [file NIHMS1768772-supplement-Supplemental_Digital_Content.pdf]

Supplemental Digital Content 1. Comparison statistics between criterion 5C and predicted percent body fat in the cross-validation cohort by sex

|                  |                         | Mean $\pm$ SD  | ICC               | <i>d</i> | SEE  | Subjective rating of SEE | Limits of agreement |       |       |                    |
|------------------|-------------------------|----------------|-------------------|----------|------|--------------------------|---------------------|-------|-------|--------------------|
|                  |                         |                |                   |          |      |                          | Bias $\pm$ 1.96 SD  | Lower | Upper | Trend              |
| Females          | Criterion 5C            | 26.2 $\pm$ 6.8 |                   |          |      |                          |                     |       |       |                    |
| ( <i>n</i> = 32) | %BF <sub>New</sub>      | 27.5 $\pm$ 5.3 | 0.83 <sup>†</sup> | 0.21     | 2.88 | Excellent/Very good      | 1.3 $\pm$ 8.7       | -7.4  | 10.0  | -0.37 <sup>‡</sup> |
|                  | %BF <sub>Evans</sub>    | 28.2 $\pm$ 6.9 | 0.81 <sup>†</sup> | 0.26     | 3.69 | Good/Fairly good         | 1.8 $\pm$ 10.2      | -8.4  | 12.0  | 0.02               |
|                  | %BF <sub>Peterson</sub> | 29.9 $\pm$ 5.2 | 0.82 <sup>†</sup> | 0.62     | 3.48 | Good                     | 3.7 $\pm$ 9.5       | -5.8  | 13.3  | -0.36              |
|                  | %BF <sub>JP</sub>       | 27.1 $\pm$ 7.6 | 0.83 <sup>†</sup> | 0.13     | 3.74 | Good                     | 0.9 $\pm$ 10.6      | -9.7  | 11.5  | 0.17               |
|                  | %BF <sub>BAI</sub>      | 28.5 $\pm$ 4.0 | 0.69 <sup>†</sup> | 0.43     | 4.09 | Fairly good              | 2.4 $\pm$ 10.3      | -8.0  | 12.7  | -0.59 <sup>‡</sup> |
|                  | %BF <sub>RFM</sub>      | 33.8 $\pm$ 6.2 | 0.82 <sup>†</sup> | 1.18     | 3.24 | Very good                | 7.7 $\pm$ 9.3       | -1.7  | 17.0  | -0.13              |
|                  | %BF <sub>BMI</sub>      | 28.1 $\pm$ 5.7 | 0.79 <sup>†</sup> | 0.31     | 3.89 | Good/Fairly good         | 1.9 $\pm$ 10.2      | -8.3  | 12.2  | -0.22              |
| Males            | Criterion 5C            | 18.3 $\pm$ 6.6 |                   |          |      |                          |                     |       |       |                    |
| ( <i>n</i> = 46) | %BF <sub>New</sub>      | 18.1 $\pm$ 5.1 | 0.86 <sup>†</sup> | -0.03    | 2.80 | Excellent/Very good      | -0.2 $\pm$ 8.4      | -8.6  | 8.3   | -0.37 <sup>‡</sup> |
|                  | %BF <sub>Evans</sub>    | 16.9 $\pm$ 6.6 | 0.82 <sup>†</sup> | -0.20    | 3.94 | Fairly good              | -1.3 $\pm$ 10.5     | -11.8 | 9.1   | 0.00               |
|                  | %BF <sub>Peterson</sub> | 22.7 $\pm$ 6.2 | 0.82 <sup>†</sup> | 0.70     | 3.41 | Very good/Good           | 4.5 $\pm$ 9.5       | -5.1  | 14.0  | -0.10              |
|                  | %BF <sub>JP</sub>       | 15.9 $\pm$ 7.5 | 0.80 <sup>†</sup> | -0.33    | 4.27 | Fairly good/Fair         | -2.3 $\pm$ 11.3     | -13.6 | 9.0   | 0.17               |
|                  | %BF <sub>BAI</sub>      | 25.7 $\pm$ 3.4 | 0.63 <sup>†</sup> | 1.42     | 4.50 | Fair                     | 7.5 $\pm$ 10.7      | -3.2  | 18.2  | -0.66 <sup>‡</sup> |
|                  | %BF <sub>RFM</sub>      | 23.9 $\pm$ 4.6 | 0.81 <sup>†</sup> | 1.00     | 3.42 | Very good/Good           | 5.7 $\pm$ 9.3       | -3.7  | 15.0  | -0.47 <sup>‡</sup> |
|                  | %BF <sub>BMI</sub>      | 22.6 $\pm$ 5.0 | 0.78 <sup>†</sup> | 0.74     | 3.76 | Good                     | 4.3 $\pm$ 9.8       | -5.5  | 14.1  | -0.36 <sup>‡</sup> |

Abbreviations: 5C, five-compartment model; ICC, intraclass correlation coefficient; *d*, Cohen's standardized effect size; SEE, standard error of the estimate; TE, total error; bias, mean difference between predicted and criterion body fat percentage; lower, lower limit (bias - 1.96 SD); upper, upper limit (bias + 1.96 SD); trend, correlation (expressed as Pearson's *r*) between the difference and average. Subjective rating of SEE is from Lohman (39).

<sup>†</sup>significant correlation ( $p < 0.001$ )

<sup>‡</sup>trend is significant ( $p < 0.01$ )
